1 **CXCR2 expression during melanoma tumorigenesis controls transcriptional**  
2 **programs that facilitate tumor growth**

3  
4  
5 \*<sup>1,2</sup>Yang J, \*<sup>1,2</sup>Bergdorf K, \*<sup>1,2</sup>Yan C, <sup>1,2</sup>Luo W, <sup>3</sup>Chen SC, <sup>3</sup>Ayers D, <sup>3</sup>Liu Q, <sup>3</sup>Liu X,  
6 <sup>4</sup>Boothby M, <sup>4</sup>Groves SM, <sup>2</sup>Oleskie AN, <sup>6</sup>Zhang X, <sup>7</sup>Maeda DY, <sup>7</sup>Zebala JA, <sup>2</sup>Quaranta V,  
7 <sup>1,2</sup>Richmond A\*\*

8  
9 <sup>1</sup>TVHS Department of Veterans Affairs, Nashville, TN, 37212; <sup>2</sup>Department of  
10 Pharmacology, Vanderbilt University School of Medicine, Nashville, TN, 37240;  
11 <sup>3</sup>Department of Biostatistics, <sup>4</sup>Department of Pathology, Microbiology, and Immunology,  
12 Vanderbilt University Medical Center, Nashville, TN 37232; <sup>5</sup>Department of  
13 Biochemistry, Vanderbilt University School of Medicine, Nashville, TN 37240;  
14 <sup>6</sup>Department of Genomic Medicine, MD Anderson Cancer Center, University of Texas,  
15 Houston, TX 77030; <sup>7</sup>Syntrix Pharmaceuticals, Auburn, WA 98001

16  
17 \*These authors contributed equally to this manuscript

18 \*\*Corresponding author [ann.richmond@vanderbilt.edu](mailto:ann.richmond@vanderbilt.edu)

19 **Abstract:**

20 **Background:** Though the CXCR2 chemokine receptor is known to play a key role in  
21 cancer growth and response to therapy, a direct link between expression of CXCR2 in  
22 tumor progenitor cells during induction of tumorigenesis has not been established.

23 **Methods:** To characterize the role of CXCR2 during melanoma tumorigenesis, we  
24 generated tamoxifen-inducible tyrosinase-promoter driven *Braf*<sup>V600E</sup>/*Pten*<sup>-/-</sup>/*Cxcr2*<sup>-/-</sup> and  
25 *NRas*<sup>Q61R</sup>/*INK4a*<sup>-/-</sup>/*Cxcr2*<sup>-/-</sup> melanoma models. In addition, the effects of a CXCR1/CXCR2  
26 antagonist, SX-682, on melanoma tumorigenesis were evaluated in *Braf*<sup>V600E</sup>/*Pten*<sup>-/-</sup> and  
27 *NRas*<sup>Q61R</sup>/*INK4a*<sup>-/-</sup> mice and in melanoma cell lines. Potential mechanisms by which *Cxcr2*  
28 affects melanoma tumorigenesis in these murine models were explored using RNAseq,  
29 mMCP-counter, ChIPseq, and qRT-PCR; flow cytometry, and reverse phosphoprotein  
30 analysis (RPPA).

31 **Results:** Genetic loss of *Cxcr2* or pharmacological inhibition of CXCR1/CXCR2 during  
32 melanoma tumor induction resulted in key changes in gene expression that reduced tumor  
33 incidence/growth and increased anti-tumor immunity. Interestingly, after *Cxcr2* ablation,  
34 *Tfcp2l1*, a key tumor suppressive transcription factor, was the only gene significantly  
35 induced with a log<sub>2</sub> fold-change greater than 2 in these three different melanoma models.

36 **Conclusions:** Here, we provide novel mechanistic insight revealing how loss of *Cxcr2*  
37 expression/activity in melanoma tumor progenitor cells results in reduced tumor burden and  
38 creation of an anti-tumor immune microenvironment. This mechanism entails an increase in  
39 expression of the tumor suppressive transcription factor, *Tfcp2l1*, along with alteration in  
40 the expression of genes involved in growth regulation, tumor suppression, stemness,  
41 differentiation, and immune modulation. These gene expression changes are coincident

42 with reduction in the activation of key growth regulatory pathways, including AKT and  
43 mTOR.

44 **Keywords: melanoma, CXCR2, tumor immune microenvironment, genomic**  
45 **analysis, genetic mouse models**

46

## 47 **Introduction**

48 Chemokines and their receptors have been shown to play an essential role in regulating  
49 tumor growth, progression, metastasis, and response to immunotherapy (1, 2, 3, 4).  
50 Though chemokines were initially identified as chemoattractants used to guide  
51 leukocyte migration, there has been increasing evidence that they can regulate other  
52 functions in a broader array of cell types, including cancer cells (5).

53 The CXCR1/CXCR2 ligand-receptor axis has been widely characterized as a driver of  
54 aggressive behavior in many cancer types, including breast, prostate, melanoma, lung,  
55 colorectal, pancreatic, and renal cancers(6). CXCR1/CXCR2 ligands, including CXCL1-  
56 3, 5-8 are produced by endothelial cells, tumor-associated macrophages, cancer-  
57 associated fibroblasts, adipocytes, and cancer cells(6). These CXCR1 and CXCR2  
58 ligands play a significant role in the recruitment of neutrophils and myeloid-derived  
59 suppressor cells (MDSCs) to the tumor microenvironment (TME), both of which are  
60 associated with poor outcomes(7, 8, 9). In addition to altering the tumor immune  
61 microenvironment, these chemokine ligands can also activate phosphatidylinositol-3-  
62 kinase (PI3K), phospholipase-C $\beta$ , calcium mobilization, mitogen-activated protein  
63 kinase (MAPK), protein kinase B (AKT), transcription factors like NF- $\kappa$ B, and gene  
64 expression on tumor cells. These chemokine responses have been linked to tumor cell  
65 survival, proliferation, migration, as well as angiogenesis(6, 10, 11).

66 Many cancer cells exhibit induction or increased expression of multiple ligands for both  
67 CXCR1 (CXCL1-3, 5-8) and CXCR2 (CXCL1-3, 5 and 7). Moreover, CXCR1 and  
68 CXCR2 are differentially expressed in human tissues, though in mouse, CXCR2 is the

69 predominant receptor mediating response to the murine chemokine ligands during  
70 inflammation, angiogenesis, and tumor growth (CXCL1,2,3 and 5, also known as KC,  
71 MIP2 $\alpha$ , MIP2 $\beta$ , and LIX)(12, 13). In addition to a function in the attraction of  
72 hematopoietic cells that influence the tumor microenvironment and tumor progression, it  
73 has been suggested that these receptors may exert autocrine effects on tumor growth.  
74 In the case of melanoma, mouse xenograft models provide compelling evidence that  
75 tumor cells take advantage of CXCR2 ligand expression to either suppress the anti-  
76 tumor immune response or to induce tumor growth and angiogenesis, alter the TME,  
77 and facilitate metastasis (3, 14)

78 The CXCR1/CXCR2 signaling nexus directly influences the sensitivity of tumor cells to  
79 chemotherapies by altering pathways associated with apoptosis and multidrug  
80 resistance (15, 16), resulting in a poor prognosis in human cancer studies (17, 18). The  
81 past decade has witnessed the generation and development of antagonists to CXCR1  
82 and CXCR2, and multiple clinical trials are underway investigating the therapeutic  
83 potential of targeting this signaling axis in inflammatory disorders and cancers  
84 (NCT03161431, NCT04245397, NCT03400332) (19, 20, 21, 22) .

85 We previously demonstrated that targeted deletion of *Cxcr2* in myeloid cells or systemic  
86 treatment with the CXCR1/CXCR2 antagonist SX-682 conferred anti-tumor immunity via  
87 reduction of MDSC infiltration into the TME and enhanced CD8<sup>+</sup> T cell activation (9).  
88 However, it remains controversial as to whether there is a direct function of either or  
89 both CXCR1 and CXCR2 on the growth of the cancer cells, and if so, which of these  
90 receptors are involved and what mechanisms are employed. To clarify the concept of an  
91 autocrine role for CXCR2 and its ligands in melanoma progenitor cells, we used

92 inducible, autochthonous models of malignant melanoma in mice. Using two distinct  
93 modes of triggering the formation of malignant melanoma (23, 24) (25), we found that  
94 tumor onset, growth, and outcome accompanied changes in the tumor  
95 microenvironment and gene expression when *Cxcr2* was deleted in melanoma  
96 precursor cells. Similar results were identified when *Cxcr1/Cxcr2* were inhibited with SX-  
97 682 during tumorigenesis. Remarkably, an analysis of common gene expression  
98 changes due to loss or inhibition of *Cxcr2* during tumorigenesis converged on one, but  
99 only one, gene -- the tumor suppressive transcription factor *Tfcp2l1*. These data indicate  
100 that a major mechanism by which *Cxcr2* inhibition regulates melanoma tumor growth is  
101 via induction of a key transcription factor with tumor suppressive activity, *Tfcp2l1*.

102

## 103 **Methods**

### 104 **Establishment of inducible melanoma mouse models**

105 All procedures involving animals were approved by the Vanderbilt University Institutional  
106 Animal Care and Use Committee (IACUC). We utilized the inducible *Braf*<sup>V600E</sup>/*PTEN*<sup>-/-</sup>  
107 melanoma model in C57BL/6 mice (23), where the underlying genetic background  
108 includes *Tyr-Cre*<sup>ER+::</sup> *Braf*<sup>CA::</sup> *Pten*<sup>lox4-5/Lox4-5</sup>. *CXCR2*<sup>fl/fl</sup> mice (*C57BL/6-CXCR2*<sup>tm1RMra/J</sup>)  
109 were obtained from Jackson Laboratories (#024638) and bred to mT/mG mice  
110 (#007907, Jackson Laboratories), which harbor a two-color fluorescent Cre-reporter  
111 allele to enable GFP-based tumor imaging (Figure S2A,C) (26). In crossing the  
112 *Braf*<sup>V600E</sup>/*PTEN*<sup>-/-</sup> mice with *CXCR2*<sup>fl/fl</sup> mT/mG mice, *Tyr-Cre*<sup>ER+::</sup> *Braf*<sup>CA::</sup> *Pten*<sup>lox4-5/Lox4-</sup>  
113 <sup>5::</sup> *mT/mG::Cxcr2*<sup>fl/fl</sup> mice and *Cre*<sup>ER+::</sup> *Braf*<sup>CA::</sup> *Pten*<sup>lox4-5/Lox4-5</sup> *mT/mG::Cxcr2*<sup>WT</sup> mice were  
114 generated. Upon administration of 4-HT (#6278, Sigma), Cre-recombinase expression

115 is induced in tyrosinase (*Tyr*) expressing cells, leading to expression of the *Braf*<sup>V600E</sup>  
116 transgene and deletion of exons 4 and 5 of *Pten* specifically in tyrosinase expressing  
117 melanocytes (Figure S2B)(23). Palpable tumors arise within one month post 4-HT  
118 induction (Figure S2B, C). Tyr-Cre targeting of melanocytes in hair follicles was verified  
119 by H&E staining and GFP expression (Figure S2D).

120 To generate an inducible *NRas* mutant/*Ink4a* deletion/*CXCR2* knockout melanoma  
121 mouse model, we utilized the *TpN*<sup>61R</sup> model from Burd et al., which recapitulates the  
122 genetics of *NRas*<sup>Q61R</sup>/*INK4a*<sup>-/-</sup> mutant human melanoma and demonstrates sensitivity to  
123 UV-induced melanoma (25). In this model, expression of mutant *NRas* and loss of *Ink4a*  
124 are under the control of the *Tyr*-promoter enhancer (*Tyr-Cre*<sup>ER</sup>::*NRas*<sup>Q61R</sup>::*Ink4a*<sup>-/-</sup>).  
125 These mice were crossed with C57BL/6 *Cxcr2*<sup>fl/fl</sup> mice. Heterozygous offspring were  
126 crossed to generate *Tyr-Cre*<sup>ER</sup>::*NRas*<sup>Q61R</sup>::*Ink4a*<sup>fl/fl</sup>::*Cxcr2*<sup>fl/fl</sup> and *Tyr-*  
127 *Cre*<sup>ER</sup>::*NRas*<sup>Q61R</sup>::*Ink4a*<sup>fl/fl</sup>::*Cxcr2*<sup>WT</sup> littermates. Newborn mice (1-2 days of age) receive  
128 one topical administration of 2μl of 20mM 4HT on the back followed by exposure to 4.5K  
129 J/m<sup>2</sup> UVB radiation (312NM 2X8 Watt tubes& Filter, Cat. # EB-280C) on day three.  
130 Tumor development was followed for 5 months. **All other standard methods are in**  
131 **the Supplemental Materials.**

132

## 133 Results

### 134 CXCR2 Correlates with Poor Prognosis in Patient Populations and Response to 135 Checkpoint inhibitors

136 Using the available Gene Expression Omnibus (GEO) cohort, we evaluated *CXCR1*,  
137 *CXCR2*, and *CXCL1-3*, 5 and 8 (*CXCR1*/*CXCR2* ligands) expression in nevi and

138 melanoma. *CXCR1* and *CXCR2* mRNA exhibited a trend toward increased expression  
139 in melanoma compared to nevi, but these differences were not statistically significant  
140 (Figure 1A). However, *CXCL1*, *CXCL2*, *CXCL3*, *CXCL5* and *CXCL8* mRNAs were  
141 significantly upregulated in melanoma samples compared to benign nevi (Figure 1B).  
142 Furthermore, there were no significant differences in *CXCR1* and *CXCR2* expression  
143 among nevi and melanoma tumors when stratified by *BRAF* or *NRAS* mutation status  
144 (Figure S1A, B). However, since the number of samples available for analysis of  
145 mutation status was small, these findings should be interpreted cautiously.

146 *CXCR2* has been associated with increased tumor growth and poor prognosis across  
147 multiple cancers(6). To define the relationship between *CXCR2* expression and the  
148 clinical prognosis of melanoma patients, we examined clinical data from the Cancer  
149 Genome Atlas (TCGA), and the skin cutaneous melanoma (SKCM) dataset using Gene  
150 Expression Profiling Interactive Analysis (GEPIA). Survival analysis comparing patients  
151 with high *CXCR2* expression (n=114) to patients with lower *CXCR2* expression (n=107)  
152 indicates that *CXCR2* expression correlates with decreased overall survival of  
153 melanoma patients (p=0.035, Figure 1C). Evaluation of survival in a patient cohort  
154 treated with anti-PD-1 therapy also suggests that patients with high *CXCR2* expression  
155 (n=24) exhibited poor prognosis in response to anti-PD-1 when compared with patients  
156 with low *CXCR2* expression (n=23, p<0.01; Figure 1D) (27). Finally, analysis of another  
157 immune checkpoint inhibitor-treated cohort showed that responding patients had  
158 significantly lower *CXCR2* expression than non-responders (Figure 1E, (p<0.05) (28).  
159 These data indicate that *CXCR2* expression correlates with poor therapeutic response  
160 in melanoma patients.



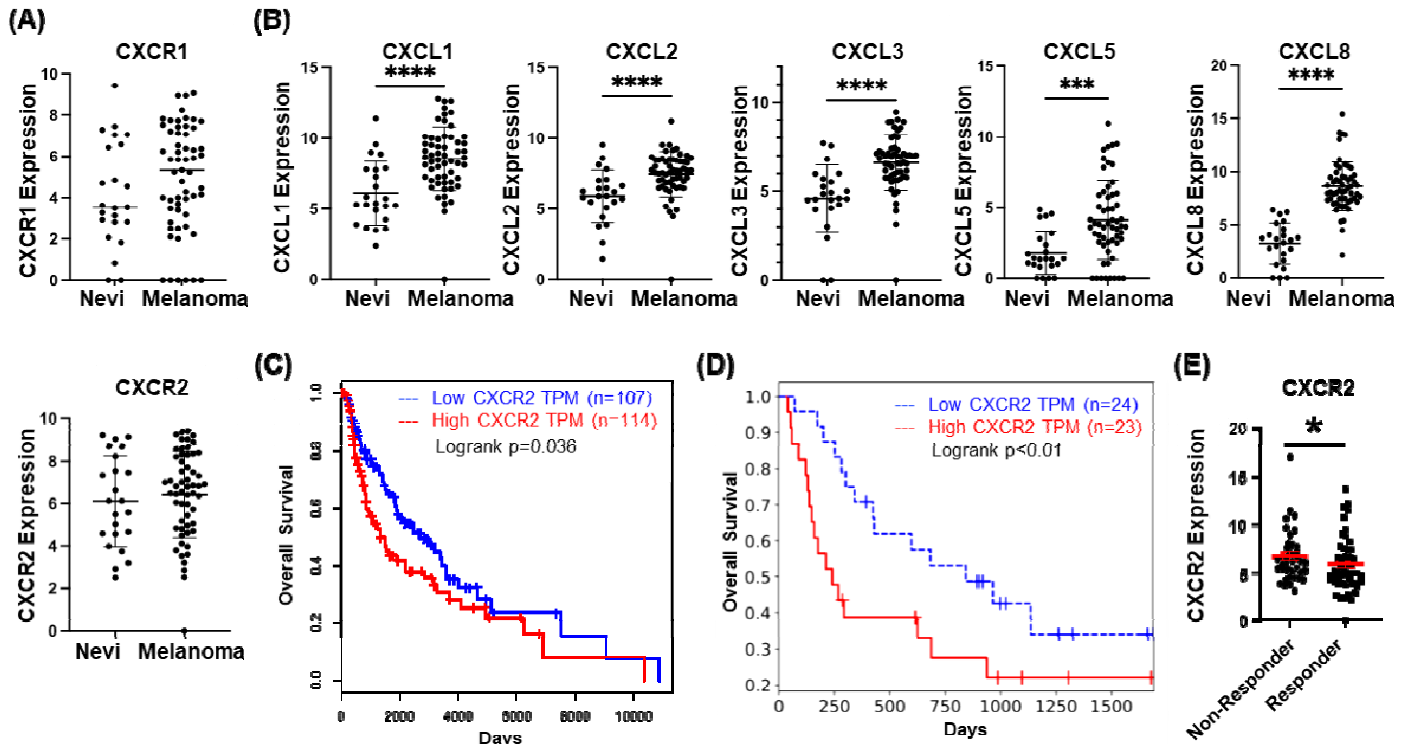

**Fig 1. CXCR2 is associated with tumorigenesis and poor prognosis.** **a** GEO dataset analysis of expression of CXCR1 and CXCR2 in nevi as compared to melanoma lesions (not significant, Welch's t-test). **b** GEO dataset analysis of expression of CXCL1, CXCL2, CXCL3, CXCL5 and CXCL8 in nevi and melanoma tissues (significance determined by Welch's t-test). **c** Overall survival plot of melanoma patients from the TCGA SKCM dataset indicates significantly improved survival ( $p=0.035$ , log-rank test) in the lowest quartile of CXCR2 expression (blue,  $n=107$ ) compared to the highest quartile (red,  $n=114$ ). **d** Analysis of survival of 25 melanoma patients treated with anti-PD1 in relation to high (red) or low (blue) expression of CXCR2 [ $p<0.01$ , log-rank test; (27)]. **e** Re-analysis of the Riaz RNA-seq database shows CXCR2 expression is lower in melanoma patients who responded to anti-PD1 treatment ( $p<0.05$ , Welch's t-test).

161

162

## 163 **CXCR2 Influences Tumor Differentiation Status and Enhances Tumor Growth**

164 To evaluate the role of CXCR2 in *Braf*<sup>V600E</sup>/*Pten*<sup>-/-</sup> melanoma tumorigenesis, we crossed  
165 C57BL/6 *Tyr-CreER+::Braf*<sup>V600E</sup>/*Pten*<sup>fl/fl</sup>::*mT/mG*:: mice (*Braf*<sup>V600E</sup>/*Pten*<sup>-/-</sup>) (23) with  
166 C57BL/6 mice carrying a *Cxcr2*<sup>fl/fl</sup> allele (24) to produce *Tyr-*  
167 *CreER+::Braf*<sup>V600E</sup>/*Pten*<sup>fl/fl</sup>::*mT/mG*::*Cxcr2*<sup>-/-</sup> and *Tyr-*  
168 *CreER+::Braf*<sup>V600E</sup>/*Pten*<sup>fl/fl</sup>::*mT/mG*::*Cxcr2*<sup>WT</sup> littermates. Four-week-old mice were  
169 treated with 4-OH tamoxifen (4HT) to induce the tyrosinase promoter-driven Cre-  
170 recombinase. The resulting melanoma tumors that developed over 36 days were  
171 counted and measured. We observed that tumor burden and incidence (Figure 2A-C)  
172 were significantly reduced in *Braf*<sup>V600E</sup>/*Pten*<sup>-/-</sup> mice with melanocyte targeted deletion of  
173 *Cxcr2* (*Braf*/*Pten*/*Cxcr2*<sup>-/-</sup>) (271±361mm<sup>3</sup>, n=21) in comparison to *Braf*<sup>V600E</sup>/*Pten*<sup>-/-</sup> mice  
174 expressing CXCR2 (*Braf*/*Pten*/*Cxcr2*<sup>WT</sup>) (615±609mm<sup>3</sup>, n=24, p<0.05). The tumor  
175 number per mouse was also reduced upon melanocytic *Cxcr2* deletion (0.7±0.9 vs.  
176 2.1±2.3, p<0.05). These data indicate that the *Cxcr2* signal transduction pathway plays  
177 a role in the induction and growth of *Braf*<sup>V600E</sup>/*Pten*<sup>-/-</sup> melanoma.

178 To determine whether *Cxcr2* is also important in *Nras/Ink4a* melanoma tumors, we  
179 crossed *Tyr-CreER+::NRas*<sup>Q61R</sup>/*Ink4a*<sup>-/-</sup>::*mT/mG*:: mice (34) with the *Cxcr2*<sup>fl/fl</sup> mice (24).  
180 New-born pups (1-2 days old) were exposed to 4-HT, followed by ultraviolet (UV)  
181 irradiation on day three, and tumor growth was evaluated over five months. We  
182 observed significantly reduced tumor volume with deletion of *Cxcr2* (360±285mm<sup>3</sup>)  
183 when compared to *NRas/Ink4a Cxcr2*<sup>WT</sup> mice (764±601mm<sup>3</sup>) (Figure 2D-F, p<0.05,  
184 n=16). However, in contrast to the *Braf*<sup>V600E</sup>/*Pten*<sup>-/-</sup> model, the number of tumors per  
185 mouse was not significantly different between *Cxcr2*<sup>-/-</sup> (1.69±1.08) and *Cxcr2*<sup>WT</sup> mice

186 (1.88±1.26, p=0.654). As the *NRas* GEM model requires UV irradiation in addition the  
187 genetic alterations, it is possible that UV irradiation induces additional oncogenic  
188 pathways that function independent of *Cxcr2*.

189 To elucidate the mechanism by which *Cxcr2* perturbation in melanocytes could alter the  
190 initiation and growth of *Braf*<sup>V600E</sup>/*Pten*<sup>-/-</sup> (*Braf/Pten*) melanoma, we examined the  
191 transcriptome of tumors arising in *Braf/Pten/Cxcr2*<sup>WT</sup> (n=7) and *Braf/Pten/Cxcr2*<sup>-/-</sup> (n=8)  
192 mice via RNA sequencing (RNAseq) analysis (Figures 2G, S3A, S4). Interestingly, gene  
193 set enrichment analysis revealed that loss of *Cxcr2* expression in *Braf/Pten* tumors  
194 resulted in a significant increase in expression of genes involved in CD4+ T cell  
195 activation and lymphocyte activation, with a trend toward increased leukocyte  
196 proliferation, immune response, and stem cell differentiation (Figure 2H). However,  
197 there is also a paradoxical change in genes involved in lymphocyte anergy. Several  
198 genes were upregulated in *Braf/Pten/Cxcr2*<sup>-/-</sup> tumors, including those that are immune  
199 related, associated with stem cell differentiation, and those involved in tumor  
200 suppression. This gene analysis also revealed downregulation of genes involved in  
201 growth, proliferation, and cell cycle; immune-related genes; motility and cell adhesion;  
202 differentiation/stemness and tumor suppression (Figure S3A). Together, these RNA  
203 sequencing data imply that *Cxcr2*<sup>-/-</sup> tumors may become less cohesive/dense, with  
204 diminished invasive potential and growth signaling as modeled by Eikenberry *et al.* (29).

205

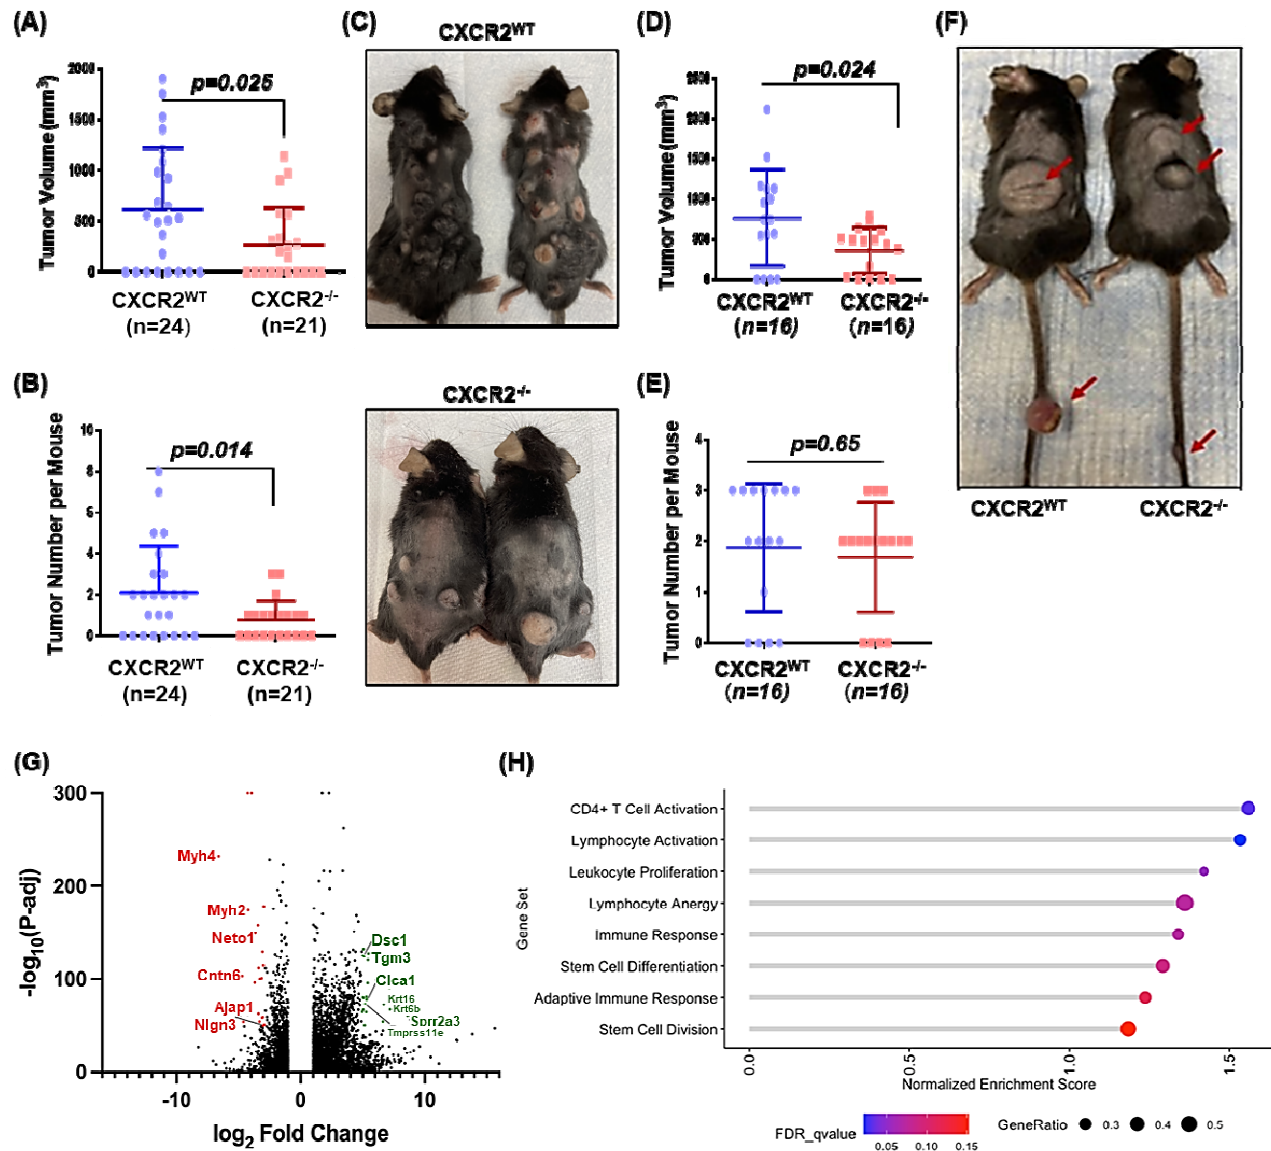

206  
**Fig 2. CXCR2 knockout decreases melanoma tumor burden.** *Tyr-Cre<sup>ER+</sup>:: Brat<sup>CA+</sup>::Pten<sup>lox4-5/lox4-5</sup>::mT/mG* C57BL/6 mice were crossed with floxed *Cxcr2* mice to obtain mice with inducible tumors with or without CXCR2 expression Thirty-six days after 4-HT administration, **a** skin tumour volume and **b** count were recorded, and **c** mice were photographed (significance determined by Welch's t-test). Similarly, *Tyr-Cre<sup>ER+</sup>::NRas<sup>Q61R</sup>::Ink4a<sup>-/-</sup>::mT/mG* mG mice were crossed with floxed *Cxcr2* mice, and resulting pups were treated with 4-HT on days 1 and 2 prior to UV irradiation on day 3 to initiate tumor formation (n=16/genotype). **d** Tumors were measured, **e** counted, and **f** mice were photographed (significance determined by Welch's t-test). RNA was extracted from *Brat<sup>Δ600E</sup>/Pten<sup>-/-</sup>/Cxcr2<sup>-/-</sup>* and *Brat<sup>Δ600E</sup>/Pten<sup>-/-</sup>/Cxcr2<sup>WT</sup>* tumors and subjected to RNAseq analysis. **g** A volcano plot showing fold change and significance of differential gene expression in *Cxcr2<sup>-/-</sup>* tumors compared to *Cxcr2<sup>WT</sup>* tumors. **h** Gene set enrichment analysis (GSEA) of RNAseq data identifies 8 gene sets enriched in *Cxcr2<sup>-/-</sup>* tumors. Point size indicates the gene ratio (percent of genes from the gene set contributing to the enrichment score) and point color represents the FDR q-value.

207 We next evaluated the RNAseq data from *Braf/Pten* mice with or without loss of CXCR2  
208 expression in melanocytes and identified the most differentially expressed genes that  
209 are associated with favorable or unfavorable outcome in melanoma patients. We  
210 identified the top twenty growth related genes with reduced expression and the top  
211 twenty genes associated with inhibition of tumor growth and favorable outcome based  
212 on their  $\log_2$  fold change and  $-\log_{10}$  p-value (Figure S4). Key growth stimulatory (Figure  
213 4A) and tumor suppressive genes (Figure 4B) are indicated by red arrows. Genes in  
214 common in both enrichment analyses in Figure S3A and Figure S4 include upregulation  
215 of the tumor suppressors *Tmprss11e*, *Adamts18* and *Tgm3*, as well as induction of the  
216 pyroptosis regulating gene *GSDMc* and the epithelial-specific *Ets* transcription factor 1  
217 (*Elf3*). Commonly down-regulated genes include activators of the lectin pathway of the  
218 complement system (*Fcna*), myosin light chain kinase 4 (*MLK4*), and pathogen  
219 recognition receptors (*Cd209*). These changes are plausible contributors to difference in  
220 tumor growth observed when *Cxcr2* is targeted in melanocytes during transformation.

## 221 **CXCR2 Contributes to an Immunosuppressive Melanoma Tumor** 222 **Microenvironment**

223 While GSEA identified enrichment of stem cell and growth-associated gene sets in  
224 *Braf/Pten/Cxcr2*<sup>-/-</sup> mice, it also revealed induction of gene sets associated with CD4+ T  
225 cell activation, lymphocyte activation, and leukocyte proliferation (Figure 2H). These  
226 results prompted analysis of the immune cell infiltrate between *Braf/Pten/Cxcr2*<sup>WT</sup> and  
227 *Braf/Pten/Cxcr2*<sup>-/-</sup> tumor-bearing mice. We first utilized the murine Microenvironment  
228 Cell Population counter (mMCPcounter, (30)), an immune deconvolution algorithm  
229 developed for bulk murine RNA sequencing data. mMCPcounter predicted an increase

230 in CD3+ T cells, CD8+ T cells, monocytes, lymphatic vessels, and eosinophils, as well  
231 as a decrease in mast cells, NK cells, and endothelial cells ( $p < 0.05$ ) (Figures 3A, S5A),  
232 suggesting enhanced anti-tumor immunity in the *Braf/Pten/Cxcr2*<sup>-/-</sup> TME. To analyze the  
233 immune environment *in vivo*, we defined the profile of CD45+ cells from  
234 *Braf/Pten/Cxcr2*<sup>WT</sup> and *Braf/Pten/Cxcr2*<sup>-/-</sup> tumor-bearing mice using FACS analysis. In  
235 agreement with the mMCPcounter predicted leukocytic infiltrates, we observed that  
236 deletion of *Cxcr2* in melanocytes undergoing transformation skewed the TME toward  
237 anti-tumor immunity. FACS analysis of the CD45+ cells in the tumors of  
238 *Braf/Pten/Cxcr2*<sup>-/-</sup> mice revealed a decrease in the immunosuppressive Ly6G+CD11b+  
239 ( $p < 0.01$ ) and CD14+ G-MDSC ( $p < 0.05$ ) cells with no change in total CD11b+ cells  
240 (Figure 3B), in addition to a trend toward decreased CD25<sup>hi</sup>CD45+CD3+ regulatory T  
241 cells and a trend toward an increase in the frequency of CD3+CD8+T cells. There was  
242 also a significant increase in memory CD44+CD4+ T cells ( $p < 0.05$ ) and activated  
243 CD69+CD8+ T cells ( $p < 0.05$ ) within the *Braf/Pten/Cxcr2*<sup>-/-</sup> tumors (Figure 3C, S5D).  
244 FACS analysis of peripheral blood cells revealed no significant change in any immune  
245 population (Figure S5B).

246

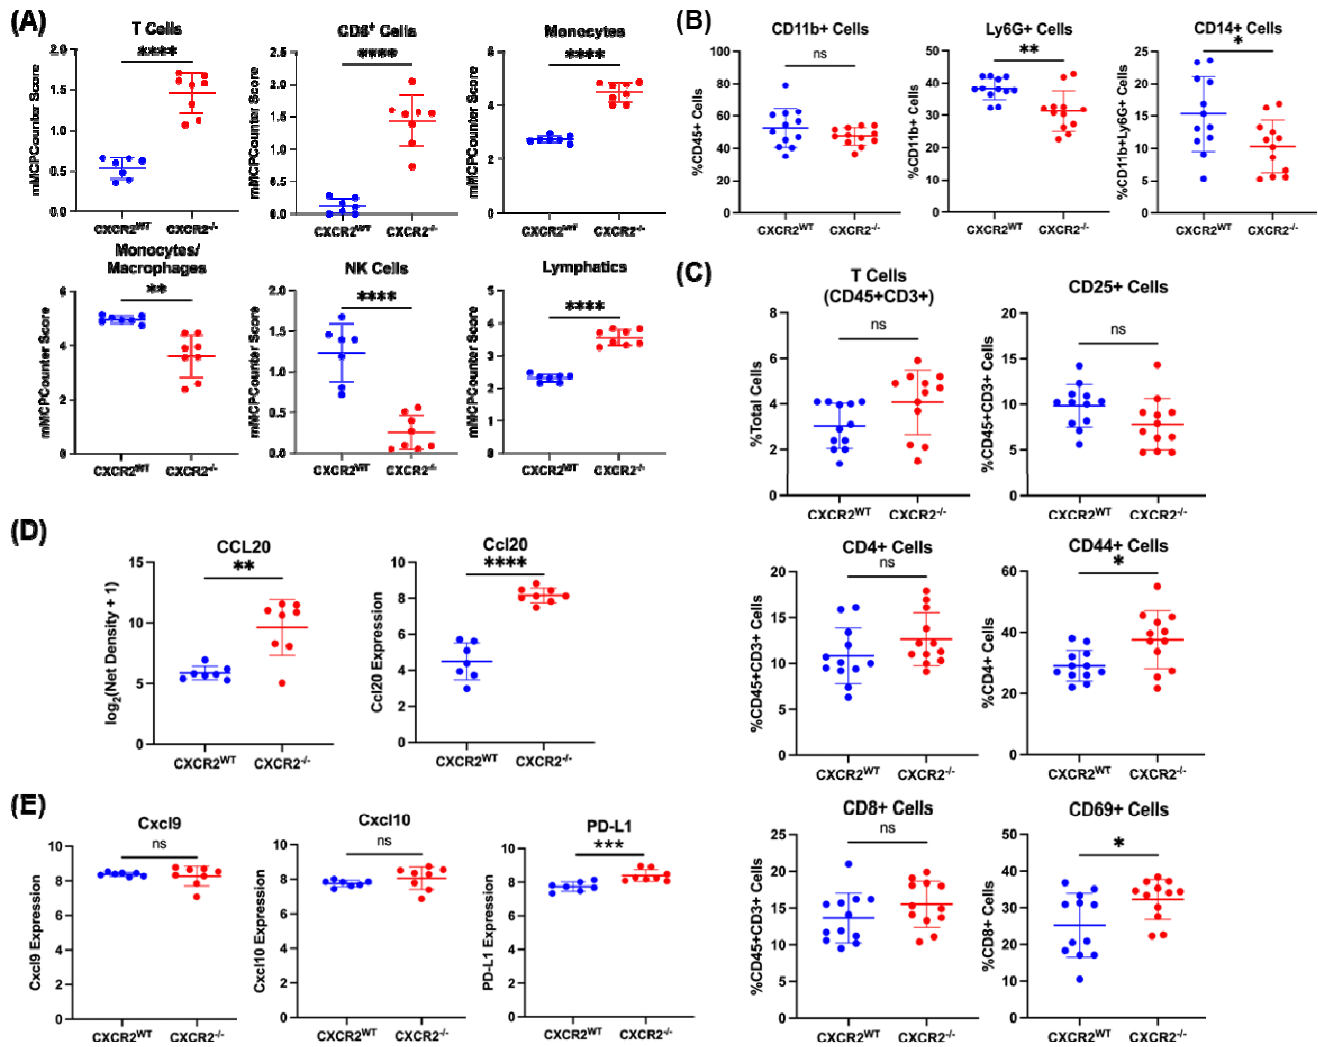

247 **Fig 3. The immune infiltrate of *Braf*<sup>V600E</sup>/*Pten*<sup>-/-</sup> tumors is altered with loss of *Cxcr2*.** **a** mMCPCounter analysis performed on bulk RNAseq data from *Braf*<sup>V600E</sup>/*Pten*<sup>-/-</sup> melanoma tumors with or without *Cxcr2* predicts significantly enhanced infiltration of T cells, CD8+ T cells, monocytes, NK cells, and lymphatic vessels into CXCR2<sup>-/-</sup> tumors. **b** FACS analysis of CD45+ myeloid cells in *Braf*<sup>V600E</sup>/*Pten*<sup>-/-</sup> melanoma reveals decreased MDSC-like cells in CXCR2<sup>-/-</sup> tumors. **c** FACS analysis of CD45+ cells in *Braf*<sup>V600E</sup>/*Pten*<sup>-/-</sup> melanoma tumors identified changes in activated CD4+CD44+ T cells and CD8+CD69+ T cells. **d** Cytokine array for 62 cytokines expressed in TME of *Braf*<sup>V600E</sup>/*Pten*<sup>-/-</sup> tumors revealed one major cytokine, CCL20, that is strongly upregulated with loss of *Cxcr2* (n=4/genotype) based on net density. These data are complemented by increased *Ccl20* mRNA with loss of *Cxcr2* in *Braf*<sup>V600E</sup>/*Pten*<sup>-/-</sup> tumors. **e** *Cxcl9*, *Cxcl10*, and *PD-L1* expression based upon RNAseq analysis from *Braf*<sup>V600E</sup>/*Pten*<sup>-/-</sup> tumors expressing or not expressing *Cxcr2* in melanocytes. All statistical significance determined via Welch's t-test.



248 The identified differences in immune cell infiltrate are highly suggestive of altered  
249 cytokine signaling within the TME. Therefore, a 62-cytokine array was performed on  
250 *Braf/Pten/Cxcr2*<sup>WT</sup> (n=4) and *Braf/Pten/Cxcr2*<sup>-/-</sup> (n=4) tumor lysates. CCL20, an  
251 inflammatory chemokine that is highly chemotactic for CCR6-expressing lymphocytes  
252 and dendritic cells, is strongly upregulated (24-fold) in the *Braf/Pten/Cxcr2*<sup>-/-</sup> TME  
253 (Figure 3D). In addition, RNAseq analysis revealed a significant increase in PD-L1  
254 expression in tumors from *Braf/Pten/Cxcr2*<sup>-/-</sup> mice compared to *Braf/Pten/Cxcr2*<sup>WT</sup> mice  
255 (Figure 3E). Furthermore, M-CSF, eotaxin, and MIP-2 were slightly increased, which  
256 could contribute to myeloid cell infiltration, and there was a slight decrease in IL-1 $\beta$  in  
257 the tumors from *Braf/Pten/Cxcr2*<sup>-/-</sup> mice as compared to tumors from *Braf/Pten/Cxcr2*<sup>WT</sup>  
258 mice (Figure S5C). These data suggest that targeted deletion of *Cxcr2* in melanocytes  
259 during tumorigenesis results in a marked increase in *Ccl20* and additional subtle  
260 changes in the cytokine milieu of the TME.

261 **CXCR1/CXCR2 Antagonist SX-682 Inhibits *Braf*<sup>V600E</sup>/*Pten*<sup>-/-</sup> and *NRas*<sup>Q61R</sup>/*Ink4a*<sup>-/-</sup>**  
262 **Melanoma Tumor Growth and Promotes Anti-Tumor Immunity**

263 Having established the importance of *Cxcr2* in the development, growth, and TME of  
264 *Braf/Pten* melanoma tumors, we sought to evaluate the therapeutic potential of systemic  
265 *Cxcr1/Cxcr2* inhibition. Thus, chow containing the *Cxcr1/Cxcr2* antagonist SX-682 (31)  
266 was administered to four-week-old mice. After two weeks of eating vehicle control or  
267 SX-682 containing chow, 4-HT was applied to the backs of the mice for three  
268 successive days. Following a month of continuous feeding on control or SX-682-  
269 containing chow, we observed that mice fed SX-682-containing chow exhibited a trend  
270 toward reduction in tumor volume compared to mice fed vehicle control chow (Figure



271 4A,  $p=0.07$ ,  $802.5\pm 724.01\text{mm}^3$  for control;  $230.20\pm 373.21\text{mm}^3$  for SX-682). Moreover,  
272 there was a trend toward decreased tumor formation in SX-682-fed mice ( $p=0.145$ ),  
273 where only 40% of SX-682-fed mice developed tumors compared to 75% of control-fed  
274 mice (Figure 4B). Similarly, *NRas*<sup>Q61R</sup>/*Ink4a*<sup>-/-</sup> (*NRas/Ink4a*) mice were fed chow  
275 containing SX-682 or control chow, and tumors that developed over five months were  
276 counted and measured. We observed that SX-682 treatment significantly suppressed  
277 tumor growth ( $p=0.041$ , Figure 4C) but only trended toward a decrease in tumor  
278 incidence ( $p=0.111$ , Figure 4D).

279 RNA sequencing analysis of control and SX-682 treated tumors from *Braf/Pten* mice  
280 identified nearly 3000 differentially expressed genes with many trends similar to those  
281 observed in *Braf/Pten/Cxcr2*<sup>-/-</sup> tumors. A volcano plot shows that a significant number of  
282 genes were strongly up or down-regulated ( $\log_2$  fold change of  $> 3$ ) with a very high  
283 level of significance ( $-\log_{10}(P\text{-adj}) > 50$ ) (Figure 4E). Upregulated genes include those  
284 involved in regulation of growth, proliferation, and cell cycle; tumor suppression;  
285 differentiation/stemness; immune regulation; and motility and adhesion. Genes  
286 downregulated in response to *Cxcr1/Cxcr2* antagonism with SX-682 include those  
287 involved in cell adhesion and cell proliferation, cell cycle and growth (Figure S3B).

288

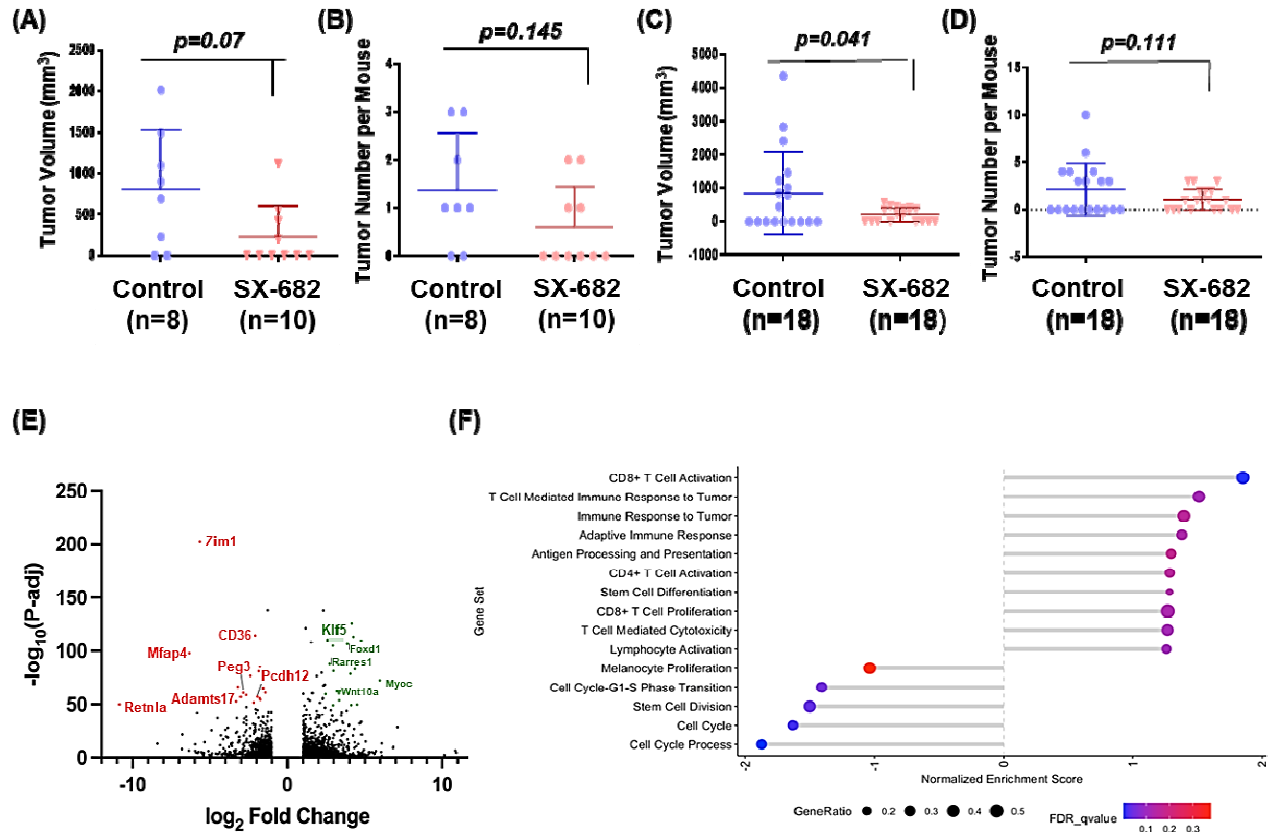

289

**Fig 4. SX-682 affects *Braf*<sup>V600E</sup>/*Pten*<sup>-/-</sup> and *NRas*<sup>Q61R</sup>/*Ink4a*<sup>-/-</sup> tumorigenesis.** A,b *Braf*<sup>V600E</sup>/*Pten*<sup>-/-</sup> and c,d *NRas*<sup>Q61R</sup>/*Ink4a*<sup>-/-</sup> mice were fed chow containing SX-682 or vehicle continuously through tumor formation, and tumors were measured and counted. Significance was determined using a Welch's t-test. e A volcano plot showing fold change and significance of differential gene expression between tumors from SX-682-fed and control-fed *Braf*<sup>V600E</sup>/*Pten*<sup>-/-</sup> mice. f Gene set enrichment analysis of SX-682 treated or control *Braf*<sup>V600E</sup>/*Pten*<sup>-/-</sup> tumors identifies gene sets enriched in SX-682 treated tumors (positive normalized enrichment score) or enriched in control tumors (negative normalized enrichment score).

290 GSEA of the tumors from *Braf/Pten* mice treated with SX-682 revealed significant  
291 increases in CD8+ T cell activation, with trends toward increased T cell-mediated  
292 immune response to the tumor, immune response to tumor, adaptive immune response,  
293 antigen processing and presentation, CD4+T cell activation, stem cell differentiation,  
294 CD8+ T cell proliferation, T cell-mediated cytotoxicity, and lymphocyte activation. There  
295 were significant decreases in genes involved in melanocyte proliferation, cell cycle  
296 process, cell cycle, stem cell division, and cell cycle G1-S transition (Figure 4F).  
297 mMCPcounter analysis of the tumor RNAseq data predicted an increase in CD8+ T  
298 cells (Figure 5A) and monocytes (Figure S6A), and a decrease in B-derived cells and  
299 cells of the lymphatics ( $p < 0.01$ ) in tumors from the SX-682-treated *Braf/Pten* mice  
300 (Figure S6A).

301 FACS analysis of SX-682 treated *Braf/Pten* tumors revealed a trend toward increased  
302 CD8+ T cells ( $p = 0.17$ ), no change in CD11b+ cells, and a significant decrease in  
303 CD11b+Ly6G+ cells ( $p < 0.001$ ) (Figures 5B, C). Additional FACS analysis of tumor  
304 CD45+ cells showed a decrease in CD4+CD3+ cells ( $p < 0.05$ ) in tumors from the SX-  
305 682 chow-fed mice (Figure S6C). In peripheral blood, there was a significant decrease  
306 in CD44+ CD4+ T cells and CD62L+ CD4+ T cells and a trend toward increased CD69+  
307 CD8+ T cells from mice fed SX-682 chow ( $p = 0.059$ ; Figure S6B). In addition, a cytokine  
308 array of tumor lysates ( $n = 4$  for each genotype) revealed a marked reduction in *Vegf*,  
309 indicating a reduction in tumor angiogenesis, and an increase in *Tnfa*, indicating a more  
310 inflammatory tumor microenvironment (Figure 5D). Moreover, RNAseq analysis of  
311 *Braf/Pten* tumors revealed that SX-682 induces expression of *Cxcl9*, *Cxcl10*, and *Pd-11*

312 (Figure 5E). Altogether, these data indicate that SX-682 alters the TME to stimulate  
 313 anti-tumor immunity and reduce tumor growth.

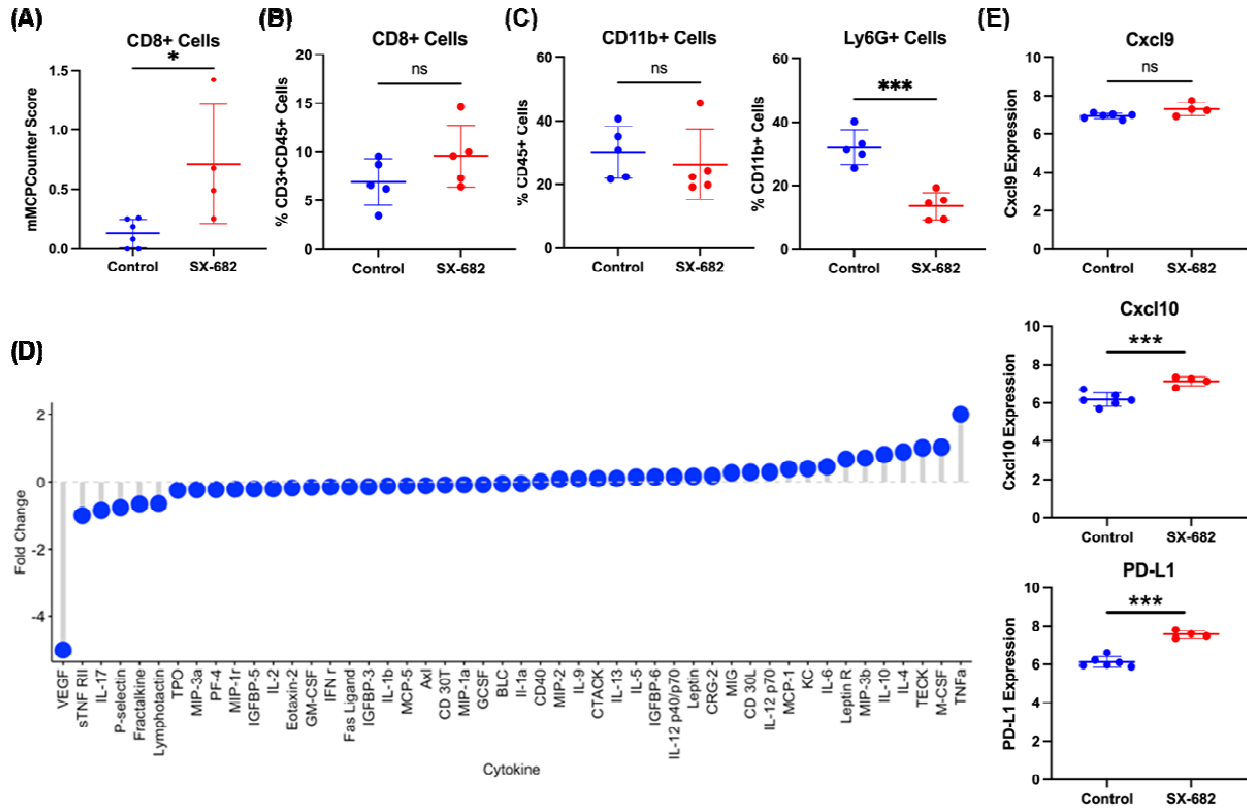

314

**Fig 5. SX-682 alters the immune profile of *Braf*<sup>V600E</sup>/*Pten*<sup>-/-</sup> melanoma.** **a** mMCPCounter analysis of bulk RNAseq data predicts enrichment for CD8+ T cell infiltrate into tumors following treatment with SX-682 (p<0.05). **b** FACS analysis confirms a trend toward increased CD8+ T cells in SX-682 treated *Braf*<sup>V600E</sup>/*Pten*<sup>-/-</sup> melanoma. **c** FACS analysis of CD45+ myeloid cells indicated a significant decrease in immunosuppressive CD11b+Ly6G+ cells, but no change in total CD11b+ cells. **d** A cytokine array was performed on control and SX-682 treated tumors, identifying a notable decrease in Vegf and an increase in Tnfa. **e** *Cxcl9*, *Cxcl10*, and *Pd-l1* expression based upon RNAseq analysis from SX-682 or control treated tumors. All statistical significance determined via Welch's t-test.

315 **SX-682 Treatment of Melan-A, B16F0, and B16F10 Cells Reveals Tumor Cell-**  
316 **Specific Gene Modulation**

317 Our murine experiments involved bulk RNA sequencing of tumors that contain tumor  
318 cells in addition to stromal and immune cells. To identify the specific effect of SX-682  
319 treatment on tumors without the contribution of other cell types, we investigated the  
320 effect of SX-682 on non-tumorigenic Melan-A cells, tumorigenic B16F0 cells, and  
321 metastatic B16F10 cells *in vitro*. First, we evaluated *Cxcr2* expression and found that  
322 B16F0 and B16F10 cells express significantly more *Cxcr2* than Melan-A cells, as  
323 evaluated by mRNA levels and surface protein labeling (Figure 6A, B). We then  
324 analyzed the effect of SX-682 (5  $\mu$ M) on the growth of these cells and observed that SX-  
325 682 treatment resulted in a small but significant inhibition of growth in B16F0 and  
326 B16F10 cells *in vitro* based on the percentage of cells staining positively for KI-67  
327 (Figure 6C) and cell number (Figure S7A). In addition, SX-682 treatment of B16F0 and  
328 B16F10 cells *in vitro* also reduced production of both *Cxcl1* (KC) and vascular  
329 endothelial growth factor (*Vegf*) as evaluated by cytokine array (Figure 6D), again  
330 indicating the potential for SX-682 to impact the immune profile of the TME.

331 To identify tumor cell-specific transcriptional changes following SX-682 treatment, we  
332 performed RNA sequencing on each of the three cell lines. Of the total differentially  
333 expressed genes, expression of 4024 genes was altered in all three lines. An additional  
334 860 genes were differentially expressed in both tumorigenic B16F0 and B16F10 lines in  
335 response to SX-682 (Figure S3C and S7B). Commonly upregulated genes include  
336 those involved in apoptosis and cell stress response and suppression of  
337 gluconeogenesis. In contrast, commonly down-regulated genes include those involved

338 in methylation, RNA splicing, and cell cycle processes (Figure S3C and S7B). Reverse  
339 phosphoprotein analysis (RPPA) identified SX-682-induced decreases in  
340 phosphoproteins involved in growth (Akt, Braf, pS445-Braf, Cdc2-pY15, Cdc6, Gsk-3b,  
341 mTor, mTor pS2448, Mmp14, Pax8, and S6), as well as SX-682-induced increases in  
342 immunomodulatory proteins (Sting, Pd-1, Pd-I1, Trim25, and Annexin I); proteins  
343 involved in the regulation of apoptosis (Puma, Blc2, Bcl2A1, BclxL, Smac); tumor  
344 suppressors (Tsc2, Wtap); and cell cycle regulators (Cdc25, Cdc42, Plk1, Egfr,  
345 Pras40\_pT246). Of interest,  $\beta$ -catenin expression is increased following SX-682  
346 treatment. This is counter-intuitive for SX-682 inhibition of tumor growth, as the Wnt/ $\beta$ -  
347 catenin pathway often drives melanoma tumor growth and metastasis. However, we  
348 observed that the phosphorylated forms of  $\beta$ -catenin (pT41 and pS45) that enable its  
349 ubiquitin-mediated degradation are increased as well. This indicates that  $\beta$ -catenin is  
350 marked for degradation, thus diminishing the potential for enhanced tumor growth.  
351 There were also increases in proteins involved in motility: myosin-1a, Pak, Cdc-42,  
352 myosin 1a\_pS1943, and Hmha1 (Figure S7C, D). Finally, there were only subtle  
353 changes in cytokine expression in response to SX-682 treatment *in vitro*, and these  
354 were inconsistent across the three cell lines (Figure S7E). Altogether, these results  
355 suggest that multiple compounding signals are induced in cells treated with SX-682,  
356 including a decrease in growth signaling, modulation of apoptosis, enhanced anti-tumor  
357 immunity, and altered cell cycle processes.

358

359

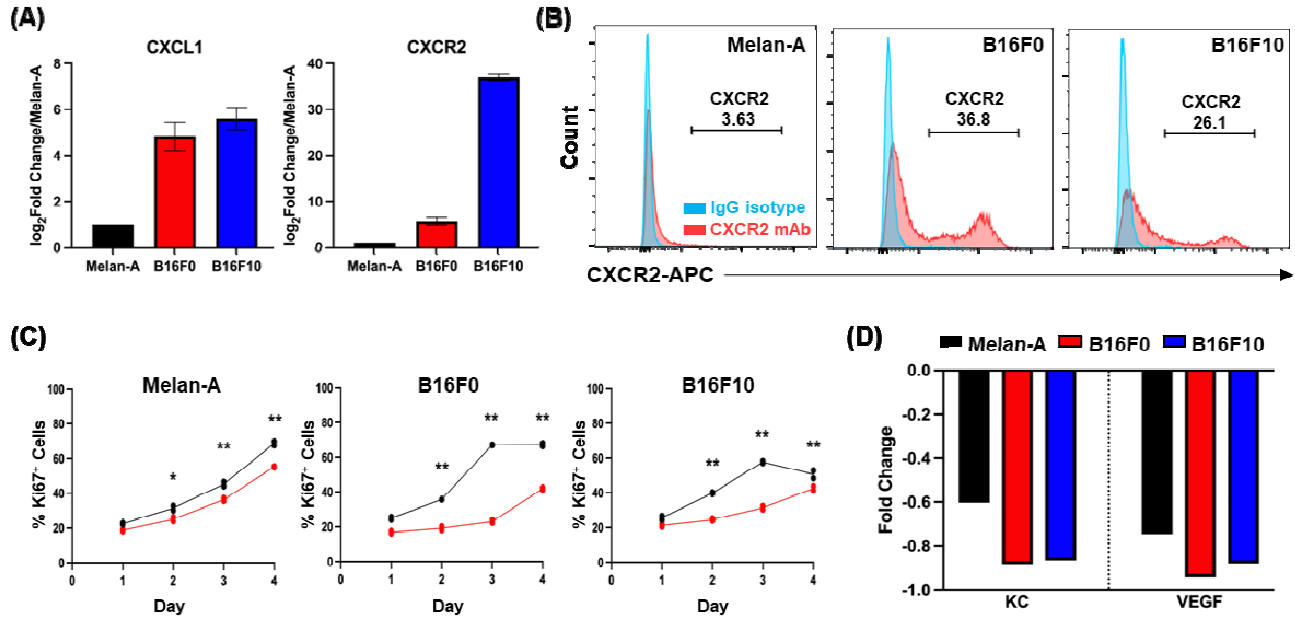

360

361

**Fig 6. Tumor cell-specific impacts of SX-682.** CXCL1 and CXCR2 expression on Melan-A, B16F0, and B16F10 cells based on **a** the NCBI database and **b** CXCR2 expression in Melan-A, B16F0 and B16F10 cells based on flow cytometry. **c** Cell lines were treated with 5  $\mu$ M SX-682 (or DMSO control) for 4 days prior to staining with Pacific Blue-Ki67 for FACS analysis. The percentage of positive staining cells was significantly decreased in the SX-682 treated cells for all cell lines (analyzed using a two-way ANOVA with Benjamini and Hochberg (BH) correction for multiple tests). **d** Cytokine array of SX-682-treated Melan-A, B16F0 and B16F10 cells shows that SX-682 treatment reduced the expression of KC and VEGF in all three cell lines.

## 362 ***Tfcp2l1* distinguishes the *Cxcr2*<sup>WT</sup> from the *Cxcr2* Perturbed Phenotype**

363 To better understand the complex transcriptional reprogramming that occurs when  
364 CXCR2 activity is diminished via knockout or with SX-682 treatment, we compared  
365 differentially expressed genes in *Braf/Pten/Cxcr2*<sup>-/-</sup> tumors, SX-682-treated tumors, and  
366 SX-682-treated tumorigenic B16F0 and B16F10 cell lines compared to controls. We  
367 noted that based upon our search for genes with a minimum of a log2 fold change >2  
368 and a p-value <0.05, only one gene stood out as significantly upregulated across all four  
369 models compared to the respective controls: Transcription factor CP2 like-1(*Tfcp2l1*)  
370 (Figure 7A, B). To verify the RNA sequencing results, we performed RT-PCR analysis  
371 of RNA samples from MelanA, B16F0, and B16F10 cells to determine *Tfcp2l1*  
372 expression. With this assay, we show that SX-682-treatment elevates *Tfcp2l1*  
373 expression in the tumorigenic cell lines (Figure S9).

374 *Tfcp2l1* is a transcription factor that contributes to the maintenance of stemness in  
375 pluripotent stem cells and can also exhibit tumor suppressive activity (32, 33, 34, 35,  
376 36). The Kruppel-like Factor (KLF) family of transcription factors works with and can be  
377 induced by *Tfcp2l1* to modulate induction and maintenance of naïve pluripotency in  
378 mouse primordial germ cells (37, 38, 39). It has been previously reported that *Tfcp2l1* is  
379 positively associated with expression of pluripotency genes including *Nanog*, *Oct4*,  
380 *Sox2*, and *Esrrb* in mouse embryonic stem cells (42). However, our data suggest a  
381 complex relationship between *Cxcr2* perturbation and *Tfcp2l1*-related gene expression.  
382 In the *Braf/Pten* model, stemness marker *Esrrb* and neural crest markers *Foxd3* and  
383 *Sox10* were decreased when *Cxcr2* was deleted. In contrast, stemness markers  
384 *Tfcp2l1*, *Klf4* and *Hmga2*, were increased. In SX-682 treated *Braf/Pten* model, there



385 was a trend toward a decrease in stemness marker *Esrrb*, a significant decrease in the  
386 neural crest marker *Sox10*, and a small but significant decrease in the melanoblast  
387 marker *Mitf* (Figures 7C, S8A-L). The melanocyte differentiation marker *Tyr* was  
388 increased in both the *CXCR2*<sup>-/-</sup> and the SX-682 treated *Braf/Pten* mouse models. In the  
389 B16F0 and B16F10 cells, RT-PCR analysis revealed that stemness markers *Esrrb*,  
390 *Hmga2*, *Myc*, *Sox2*, neural crest marker *Sox10*, and melanoblast marker *Mitf* were  
391 significantly decreased in response to SX-682-treatment *in vitro*. *Foxd3* was significantly  
392 decreased in B16F10 and trended toward significant reduction in B16F10. In contrast,  
393 stemness markers *Tfcp2l1*, *Nanog* and *Notch1* were increased, while there was a  
394 decrease in *Tyr* expression (Figure S9). Altogether, these data imply that with ablation  
395 of *Cxcr2* activity, there is an increase in some stemness markers, a decrease in neural  
396 crest markers, and a trend toward a decrease in melanoblast markers. However, there  
397 is variability in the mix of these markers from model to model. In the mouse models,  
398 tyrosinase (*Tyr*) continues to be highly expressed, though in the B16 cell cultures, SX-  
399 682 decreased its expression.

400 To support the relevance of upregulation of the transcription factor, *Tfcp2l1*, in  
401 association with loss of CXCR2 signaling, we performed an orthogonal approach based  
402 on weighted gene co-expression network analysis (WGCNA). WGCNA was applied to  
403 the RNA-seq data from these tumors to generate groups of highly correlated genes, or  
404 gene modules, that functionally distinguish *Braf/Pten/Cxcr2*<sup>-/-</sup> and *Braf/Pten/Cxcr2*<sup>WT</sup>  
405 tumors (Figure S10). Using an ANOVA test between sample conditions, we found six  
406 distinct modules that significantly distinguish the transcriptional programs of *Cxcr2*<sup>WT</sup>  
407 and *Cxcr2*<sup>-/-</sup> tumors (Figure S10). Gene ontology (GO) analysis showed each module is

408 enriched in distinct functions: the *Cxcr2*<sup>WT</sup>-upregulated modules are enriched in GO  
409 terms such as protein localization to mitochondrion (blue), aerobic respiration and  
410 oxidative phosphorylation (green and brown, respectively), and signaling (yellow), while  
411 the *Cxcr2*<sup>-/-</sup>-upregulated modules are enriched for GPCR signaling (red) and skin  
412 development (turquoise,). These changes in gene expression may result as an  
413 adaptation to the loss of CXCR2 function. Interestingly, the WGCNA module  
414 membership score (kME) indicated that *Tfcp2l1* is central to the turquoise module (kME  
415 = 0.854) and significantly upregulated in the *Cxcr2*<sup>-/-</sup> samples (FDR-adjusted  
416 p=0.0000286) (Figure 7D).

417

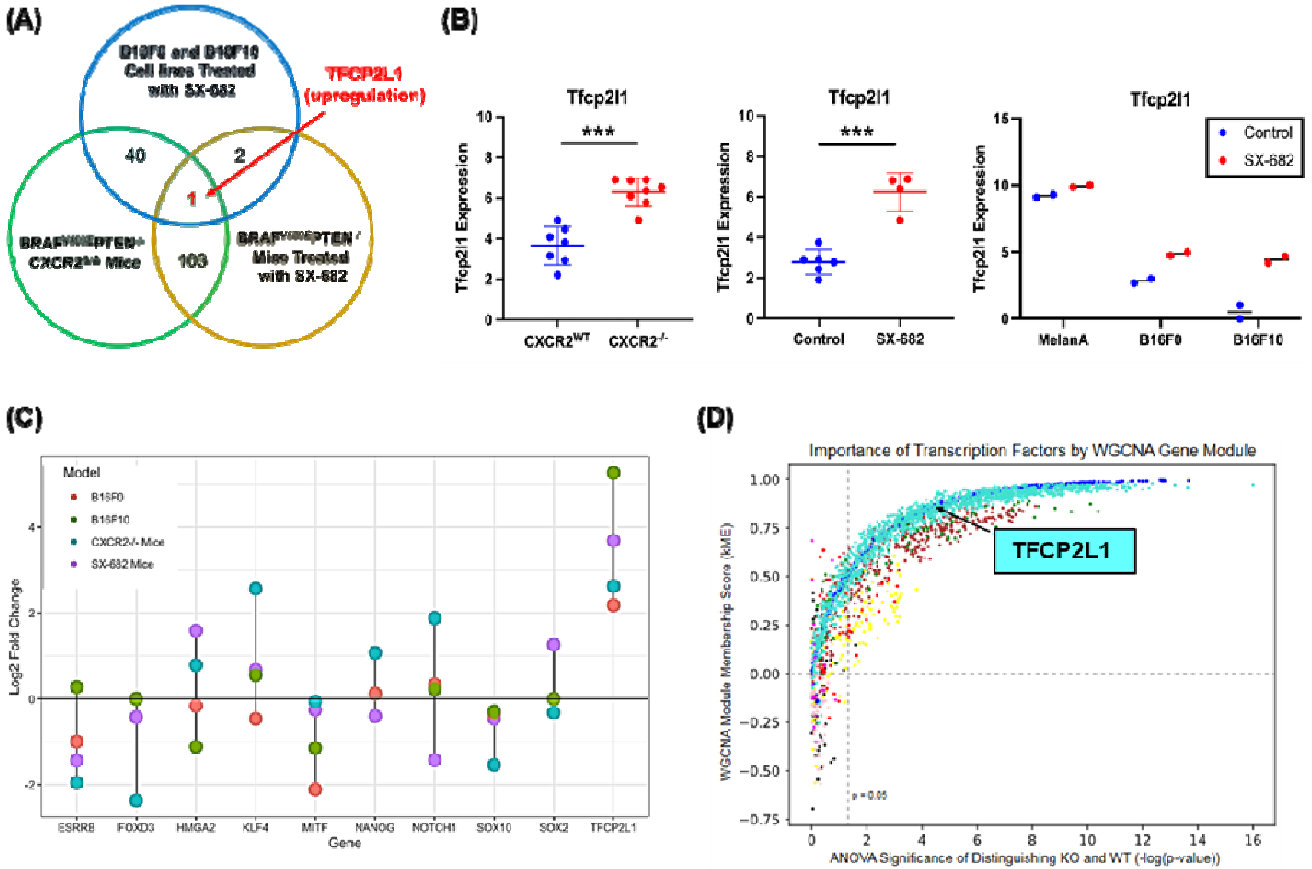

418 **Fig 7. *Tfc211* is commonly upregulated across three models of CXCR2 perturbation. a, b**  
 In comparing expression data from *Braf*<sup>V600E</sup>/*Pten*<sup>-/-</sup>/*Cxcr2*<sup>-/-</sup> tumors. *Braf*<sup>V600E</sup>/*Pten*<sup>-/-</sup> tumors  
 419 upregulated compared to appropriate controls (as determined by Welch's t-test). **c** Log<sub>2</sub> fold  
 change for *Tfc211* and related genes across experimental groups based upon RNAseq analysis.  
**d** Identification of transcription factors central to Weighted Correlation Network Analysis (WGCNA)  
 co-expressed gene modules (by kME) and significantly differentially expressed between  
*Braf*<sup>V600E</sup>/*Pten*<sup>-/-</sup>/*Cxcr2*<sup>-/-</sup> and *Braf*<sup>V600E</sup>/*Pten*<sup>-/-</sup>/*Cxcr2*<sup>WT</sup> tumors. TFs are colored by gene module and  
 show varying levels of centrality to each module and importance in distinguishing WT and KO  
 tumors. Turquoise dots represent transcription factors that are up in the *Braf*<sup>V600E</sup>/*Pten*<sup>-/-</sup>/*Cxcr2*<sup>-/-</sup>  
 tumors and blue dots represent transcription factors that are up in the *Braf*<sup>V600E</sup>/*Pten*<sup>-/-</sup>/*Cxcr2*<sup>WT</sup>  
 tumors.

420 Finally, to define the activity of Tfc2l1 following CXCR2 perturbation, we performed  
421 chromatin immunoprecipitation and sequencing analysis (ChIPseq) on B16F0  
422 tumorigenic melanoma cells following treatment with vehicle or SX-682. In identifying  
423 promoters bound by Tfc2l1 in each condition in addition to RNAseq data, we can  
424 delineate SX-682-induced gene set enrichment. Interestingly, enrichment analysis of  
425 Tfc2l1-bound genes revealed that SX-682 treatment increased expression of genes  
426 associated with the adaptive immune system and response to hormones (Figure S11A).  
427 SX-682 treatment also enriched Tfc2l1 binding to and repression of genes involved in  
428 the RAF/MAPK cascade,  $\beta$ -catenin independent Wnt signaling pathways, and  
429 catabolism (Figure S11B). When data from RNAseq, RPPA, and ChIPseq analysis were  
430 examined using Metascape, key regulatory pathways emerged as commonly associated  
431 with CXCR2 loss of function (Figure S11C, D). These data are consistent with the  
432 observed reduction in tumor growth when CXCR2 signaling is blocked and suggest that  
433 changes in gene expression are associated with Tfc2l1 transcriptional control.

434 **Does CXCL1 activation of normal melanocytes suppress the TFCP2L1**  
435 **transcriptional program?**

436 To gain insight into how CXCL1 activation of CXCR2 regulates the expression of  
437 stemness and differentiation markers, RNAseq analysis was performed on normal  
438 human epidermal melanocyte (NHEM) cultures treated with CXCL1 or with CXCL1 and  
439 SX-682 (Figure S12). CXCL1 supplementation was utilized in this model to recreate the  
440 enhanced baseline CXCR2 activation of tumorigenic cells. Consistent with this, CXCL1  
441 increased the proliferation of NHEM cells *in vitro* (Figure S12A). Moreover, CXCL1  
442 treatment increased expression of a number of genes, and this effect was lost with SX-

443 682 treatment (Figure S12B, white oval). For example, CXCL1 treatment of NHEM cells  
444 induced a trend toward increased expression of *MITF*, *BMP6*, *WNT5A*, and *SOX10*, and  
445 the addition of SX-682 reversed this trend. Moreover SX-682 treatment resulted in  
446 induction of expression of a host of genes that are lowly expressed in control and  
447 CXCL1 treated NHEM cells (Figure S12B, yellow box) and suppresses expression of  
448 many highly expressed genes in control and SX-682-treated NHEMs (Figure S12B,  
449 orange box). SX-682 also induced a trend toward elevated *TFCP2L1*, *KLF4*, *FOXD3*,  
450 *FOXD1*, and *CCL20* expression over that produced by CXCL1 alone (Figure S12C).  
451 These data clearly show that loss of CXCR2 activity dramatically alters gene  
452 expression, resulting in reduced CXCL1-induced proliferation of NHEM. In addition to  
453 the effects on stemness and differentiation markers, we also found that several  
454 chemokines, interleukins (Table S1), and TNF-related cytokines and interferons (Table  
455 S2) were altered when NHEMs were treated with combined CXCL1 and SX-682. SX-  
456 682 treatment increased expression of inflammatory genes *CCL20*, *IL18R1*, *IL1RL1* and  
457 decreased expression of chemokines associated with macrophage and MDSC  
458 recruitment (*CCL2*, *CCL7*, *CCL8*, *CXCL1*, *CXCL12*, *CXCL6* and *IL33*) as well as TNF  
459 family members involved in MAPK activation, osteoclastogenesis, and B cell activation  
460 (*C1QTNF2*, *TNFRSF21*, *TNFSF11*, and *TNFSF13B*).

461 Taken together, our data from both tumor models and *in vitro* studies show that CXCR2  
462 activation is associated with activation of the MAPK cascade, AKT, and WNT signaling,  
463 expression of chemokines that recruit MDSCs and protumor macrophages, and  
464 enhanced tumor growth. In contrast, loss of CXCR2 or inhibition of CXCR1/CXCR2 in  
465 melanoma progenitor cells is associated with expression of genes associated with

466 inflammation, T cell recruitment, pluripotency, and reduced tumorigenicity. The  
467 mechanism for these changes in gene expression are in part due to induction of  
468 *Tfcp2l1*, a transcription factor that regulates genes that suppress tumorigenicity.

469

## 470 **Discussion**

471 The CXCR1 and CXCR2 receptors are G protein-coupled receptors that generate  
472 downstream signals including PI3K and AKT, often implicated in growth (6, 11, 40, 41,  
473 42). The role of CXCR2 in cell motility has been well characterized, and the signals  
474 generated through this receptor leading to activation of AKT and ERK also modulate cell  
475 proliferation and growth(43, 44).

476 CXCR1 has been reported to be important for the renewal of a population of stem cell-  
477 like cells in human breast cancer (45). In mice, CXCR2 controls functions normally  
478 regulated by CXCR1 in humans, thus it is plausible that CXCR2 may also modulate  
479 stemness. Here, we examined the role of CXCR2 in melanocyte tumorigenesis and  
480 observed that loss of CXCR2 in tyrosinase-expressing melanocytes reduced melanoma  
481 tumor burden in *Braf/Pten* and *NRas/Ink4a* murine melanoma and modulated the  
482 expression of melanocyte stemness and differentiation markers.

483 We observed that the mechanism by which loss of *Cxcr2* activity during melanocyte  
484 tumorigenesis resulted in reduced tumor growth in *Braf/Pten* mice was due to major  
485 changes in gene expression, with decreased expression of genes involved in  
486 proliferation and increased expression of genes associated with tumor suppression, T  
487 cell recruitment and differentiation, and apoptosis. These gene expression data from  
488 RNAseq analysis were further supported by phospho-proteomic data. We observed that  
489 loss of *Cxcr2* activity in tumor cells resulted in a change in the tumor immune  
490 microenvironment, with increased CD8+ T cells and reduced macrophages and MDSC-  
491 like cells. When *Cxcr1/Cxcr2* were antagonized in *Braf/Pten* mice and tumorigenic

492 melanoma cell lines via treatment with SX-682, similar alterations in the gene  
493 expression profiles were achieved, and this was accompanied by development of anti-  
494 tumor immune microenvironment.

495 When we looked for genes significantly induced in *Cxcr2*<sup>-/-</sup> tumors, SX-682 treated  
496 tumors, and B16F0 and B16F10 cell lines, one common gene emerged: *Tfcp2l1*.  
497 *Tfcp2l1* is a crucial transcription factor that induces the expression of genes associated  
498 with stemness in embryonic stem cells (32). As such, we probed the relationship  
499 between *Tfcp2l1*, differentiation along the melanocyte lineage, and cancer stem cells  
500 within melanoma.

501 Much of our understanding of melanocyte lineage came from *in vitro* studies that  
502 involved the differentiation of human pluripotent stem cells along a neural crest lineage,  
503 then on to form melanocytes (46). Wnt ligands and *Bmp4* induce the early transition of  
504 Oct4+Nanog+ pluripotential cells into Sox10+ neural crest cells. Exposure to  
505 endothelins and *Bmp4* promotes neural crest cell differentiation to Mitf+cKit+  
506 melanoblasts, and these can be terminally differentiated to Tyr+Oca2+ melanocytes  
507 through continued exposure to Wnt ligands, *Bmp4*, and induction of intracellular cAMP  
508 (47). In the melanoma models used in our studies, the targeted alterations in gene  
509 expression (*Braf/Pten/Cxcr2*<sup>-/-</sup>) occur in tyrosinase expressing melanocytes.  
510 Interestingly, while loss of CXCR2 expression or activity was not associated with  
511 reduction in tyrosinase in our mouse models, we noted a decrease in the expression  
512 neural crest markers *Sox10* and *Foxd3* in tumors that developed when *Cxcr2* activity  
513 was ablated. In addition, there was an increase in expression of some markers  
514 associated with pluripotency or stemness.



515 While we do see consistent *Tfcp2l1* induction across all our models of *Cxcr2*  
516 perturbation, trends in *Tfcp2l1*-regulated genes are not as clear. There is a trend toward  
517 increased *Klf4*, *Hmga2*, *Notch1*, *Myc*, and *Stat3* expression which would suggest that  
518 tumors with loss of *Cxcr2* are less differentiated. However, *Esrrb*, which has been  
519 established as a direct target of *Tfcp2l1* binding and induction in ESCs (39), is  
520 significantly decreased in our *Cxcr2*<sup>-/-</sup> tumors. The implications of this shift in stemness  
521 markers in relation to melanoma aggression, treatment sensitivity, and overall prognosis  
522 is currently unknown.

523 Our finding that loss or inhibition of *Cxcr2* activity in melanocytic cells results in changes  
524 in markers associated with stemness, neural crest cells, and melanoblasts in  
525 association with a reduction of tumor formation and growth is somewhat paradoxical.  
526 However, human melanoma tumors are quite heterogeneous (48), with stem-like cell  
527 populations as well as more differentiated populations expressing MITF, TYR, and  
528 MELANA. Of note, nests of stem-like melanoma cells have been identified in metastatic  
529 lesions in head and neck cancer patients and shown to express *NANOG*, *OCT4*, *SOX2*,  
530 *KLF4*, AND *cMYC* (48). Moreover, melanocytes and melanoma cells have been  
531 dedifferentiated to iPSCs by transfecting in *Oct4*, *c-Myc*, and *Klf4* expression vectors.  
532 The resulting iPSCs express *Nanog* and *Oct4* and can be differentiated into fibroblast-  
533 like cells (49). Our data suggest that loss of CXCR2 signaling may reduce sub-  
534 populations of melanoma cells expressing the neural crest marker *Sox10* and stem cell  
535 marker *Esrrb* but increases populations with the stemness markers *Klf4*, *Hmga1*, and  
536 *Tfcp2l1*. Moreover, the gene expression pattern in the six functionally enriched states of  
537 tumor cells previously established by single-cell transcriptomics: melanocytic, neural

538 crest-like, antigen-presenting, RNA processing, stem-like, and stress-like appear to be  
539 altered with loss of *Cxcr2* signaling, especially in the melanocytic state (50).

540 **Conclusion:**

541 We demonstrate that targeted deletion of *Cxcr2* in tyrosinase-expressing melanoma  
542 precursor cells concurrent with induction of the *Braf*<sup>V600E</sup> transgene and loss of *Pten*  
543 expression or induction of *NRas*<sup>Q61R</sup> and loss of *Ink4a*, resulted in a significant reduction  
544 of melanoma burden. Notably, we also observed reduced expression of genes involved  
545 in growth, increased expression of genes involved in tumor suppression, and promotion  
546 of an anti-tumor immune environment when *Cxcr2* was deleted in tyrosinase-expressing  
547 melanoma precursor cells during transformation. Importantly, we show that the  
548 CXCR1/CXCR2 antagonist, SX-682, accomplishes a similar reduction in melanoma  
549 tumor burden, establishes an anti-tumor immune microenvironment, and significantly  
550 alters the transcriptional profile of melanoma cells when delivered during the  
551 transformation process. A key mechanism for these transcriptional changes involves  
552 increased expression of *Tfcp2l1*, a predicted tumor suppressive transcription factor  
553 when *Cxcr2* activity is blocked.

554 Our data support combining CXCR1/CXCR2 antagonists with immunotherapy for  
555 melanoma patients. Consistent with this concept, we have shown that the antagonism  
556 of *Cxcr2* upregulates PD-L1 expression and enhances the response of melanoma cells  
557 to anti-PD-1(9). Moreover, CXCR1/CXCR2 antagonists combined with anti-PD-1 are  
558 currently in clinical trials for the treatment of melanoma (NCT03161431). Moving

559 forward, it will be essential to identify the subset of patients most likely to respond to this  
560 combination therapy and to develop protocols for maximal response.

## 561 **List of abbreviations**

562 CXCR2, C-X-C Motif Chemokine Receptor 2. Ink4a, inhibitor of cyclin-dependent kinase  
563 4a. Pten, phosphatase and tensin Homolog. TFCEP2L1, Transcription Factor CP2 Like 1.  
564 MDSC, myeloid-derived suppressor cells. TME, tumor microenvironment. PI3K,  
565 phosphatidylinositol-3-kinase. MAPK, mitogen-activated protein kinase. AKT, protein  
566 kinase B. NF- $\kappa$ B, nuclear factor kappa-light-chain-enhancer of activated B cells. KC,  
567 keratinocyte chemoattractant. MIP-2, macrophage-inflammatory protein-2. LIX1, limb  
568 and CNS expressed 1. TCGA, the cancer genome atlas. GEPIA, gene expression  
569 profiling interactive analysis. GSEA, gene set enrichment analysis. WGCNA, weighted  
570 gene co-expression network analysis. PD-1, programmed cell death protein 1. CRE, cis  
571 regulatory element. 4-HT, Hydroxytamoxifen. mT/mG, a cell membrane-localized  
572 Tomato (mT) and EGFP (mG) as a two-color fluorescent Cre-reporter allele. RNAseq,  
573 RNA sequencing. Tmprss11e, transmembrane serine protease 11e. Adamts18, ADAM  
574 metalloproteinase with thrombospondin type 1 motif 18. Tgm3, transglutaminase 3.  
575 GSDMc, gasdermin C. Elf3, E74 like ETS transcription factor 3. Fcna, ficolin A. MLK4,  
576 myosin light chain kinase 4. FACS, fluorescence activated cell sorting. M-CSF,  
577 macrophage colony-stimulating factor. VEGF, Vascular endothelial growth factor.  
578 RPPA, reverse phosphoprotein analysis. mTOR, mammalian target of rapamycin. MMP,  
579 matrix metalloproteinase. PAX8, paired box gene 8. STING, stimulator of interferon  
580 genes. TRIM25, tripartite motif containing 25. PUMA, p53 upregulated modulator of  
581 apoptosis. BclxL, B-cell lymphoma-extra large. Smac, second mitochondrial activator of

582 caspases. TSC2, tuberous sclerosis complex 2. WTAP, Wilms tumor suppressor 1  
583 associated protein. PLK1, polo like kinase 1. PRAS40, the proline-rich AKT substrate of  
584 40 kDa. HMHA1, minor histocompatibility protein HA-1. KLF, kruppel-like factor. Nanog,  
585 nanog homeobox. Oct4, octamer-binding transcription factor 4. Sox2, SRY-box  
586 transcription factor 2. Esrrb, estrogen related receptor beta. Notch1, notch receptor 1.  
587 Hmga2, high mobility group AT-hook 2. Foxd3, forkhead box D3. ANOVA, analysis of  
588 variance. CHIPseq, chromatin immunoprecipitation and sequencing analysis. NHEM,  
589 normal human epidermal melanocyte. MELANA, melanocyte antigen.

590

591 **Declarations**

592 **Ethical approval and consent to participate**

593 Animal studies were approved by the Vanderbilt Institutional Care and Animal Use  
594 Committee (IACUC) and were performed in accordance with Vanderbilt IACUC  
595 guidelines.

596 **Consent for publication**

597 Not applicable.

598 **Funding**

599 We are thankful for grant support from NCI R01CA116022 (AR). VA SRCS Award  
600 IK6BX005225 (AR), VA Merit Award 101BX002301 (AR), Lloyd Foundation for  
601 Melanoma Research (CY), NCI T32 CA110025-11 (KB), NCI U54 CA217450 (VQ), NCI  
602 T32 CA009582 (SG), and NCI T32 CA009592 (AO). Flow Cytometry experiments were  
603 performed in the VUMC Flow Cytometry Shared Resource that is supported by the  
604 Vanderbilt Ingram Cancer Center (P30 CA68485) and the Vanderbilt Digestive Disease  
605 Research Center (DK058404). The Translational Pathology Shared Resource is  
606 supported by NCI/NIH Cancer Center Support Grant P30CA068485. Sequencing  
607 support was provided by the VUMC VANTAGE Core Facility, also supported by P30  
608 CA68485.

609 **Acknowledgments**

610 We thank Dorothea Bennett for the MelanA cell line (University of Texas) and Christine  
611 Burd (The Ohio State University School of Medicine) for the *Tyr-CRE-ERT2-*  
612 *NRas<sup>Q61</sup>R/p16Ink4a<sup>-/-</sup>* mice. We appreciate Tracy Handel (University of California, San  
613 Diego) for her helpful comments during the preparation of this manuscript.

#### 614 **Author Contributions**

615 J Yang performed the animal experiments, K Bergdorf analyzed the RNAseq data, C  
616 Yan analyzed human datasets from multiple sources, e.g., GEO, TCGA, TIDE, Riaz et  
617 al., 2017, and Chen et al., 2016, S-C Chen and D Ayers performed the biostatistical  
618 analysis, Q Liu, X Liu extracted the raw RNAseq data and provided analysis, W Luo  
619 helped with the ChIP-seq experiments, M Boothby provided immunology expertise, S M  
620 Groves, AN Oleskie, and V Quaranta assisted with the transcription factor analysis, JA  
621 Zebala and DY Maeda provided expertise for SX-682 experiments, A Richmond  
622 designed the study, oversaw the gathering and interpretation of data, all the authors  
623 contributed to the writing of the manuscript.

#### 624 **Competing interests**

625 JA Zebala and DY Maeda are affiliated with Syntrix Pharmaceuticals and provided the  
626 drug for these studies. The other authors do not have any competing interests to  
627 disclose.

#### 628 **Availability of data and materials**

629 The datasets supporting the conclusions of this article are available in the Gene  
630 Expression Omnibus under accession GSE223290.

631

632 **References:**

- 633 1. Hanahan D. Hallmarks of Cancer: New Dimensions. *Cancer Discov.*  
634 2022;12(1):31-46.
- 635 2. Moser B. Emerging Roles of Chemokines in Cancer Immunotherapy. *Cancers*  
636 (Basel). 2022;14(15).
- 637 3. Singh S, Nannuru KC, Sadanandam A, Varney ML, Singh RK. CXCR1 and  
638 CXCR2 enhances human melanoma tumorigenesis, growth and invasion. *Br J Cancer.*  
639 2009;100(10):1638-46.
- 640 4. Vandercappellen J, Van Damme J, Struyf S. The role of CXC chemokines and  
641 their receptors in cancer. *Cancer Lett.* 2008;267(2):226-44.
- 642 5. Raman D, Sobolik-Delmaire T, Richmond A. Chemokines in health and disease.  
643 *Exp Cell Res.* 2011;317(5):575-89.
- 644 6. Ha H, Debnath B, Neamati N. Role of the CXCL8-CXCR1/2 Axis in Cancer and  
645 Inflammatory Diseases. *Theranostics.* 2017;7(6):1543-88.
- 646 7. Bullock K, Richmond A. Suppressing MDSC Recruitment to the Tumor  
647 Microenvironment by Antagonizing CXCR2 to Enhance the Efficacy of Immunotherapy.  
648 *Cancers (Basel).* 2021;13(24).
- 649 8. Che J, Song R, Chen B, Dong X. Targeting CXCR1/2: The medicinal potential as  
650 cancer immunotherapy agents, antagonists research highlights and challenges ahead.  
651 *Eur J Med Chem.* 2020;185:111853.
- 652 9. Yang J, Yan C, Vilgelm AE, Chen SC, Ayers GD, Johnson CA, et al. Targeted  
653 Deletion of CXCR2 in Myeloid Cells Alters the Tumor Immune Environment to Improve  
654 Antitumor Immunity. *Cancer Immunol Res.* 2021;9(2):200-13.
- 655 10. Addison CL, Daniel TO, Burdick MD, Liu H, Ehlert JE, Xue YY, et al. The CXC  
656 chemokine receptor 2, CXCR2, is the putative receptor for ELR+ CXC chemokine-  
657 induced angiogenic activity. *J Immunol.* 2000;165(9):5269-77.
- 658 11. Sai J, Raman D, Liu Y, Wikswa J, Richmond A. Parallel phosphatidylinositol 3-  
659 kinase (PI3K)-dependent and Src-dependent pathways lead to CXCL8-mediated Rac2  
660 activation and chemotaxis. *J Biol Chem.* 2008;283(39):26538-47.
- 661 12. Fan X, Patera AC, Pong-Kennedy A, Deno G, Gonsiorek W, Manfra DJ, et al.  
662 Murine CXCR1 is a functional receptor for GCP-2/CXCL6 and interleukin-8/CXCL8. *J*  
663 *Biol Chem.* 2007;282(16):11658-66.
- 664 13. Moepps B. CXCR1 and CXCR2 and Ligands. Basel, Switzerland: Birkhauser;  
665 2015.
- 666 14. Balentien E, Mufson BE, Shattuck RL, Derynck R, Richmond A. Effects of  
667 MGSA/GRO alpha on melanocyte transformation. *Oncogene.* 1991;6(7):1115-24.
- 668 15. Shi Z, Yang WM, Chen LP, Yang DH, Zhou Q, Zhu J, et al. Enhanced  
669 chemosensitization in multidrug-resistant human breast cancer cells by inhibition of IL-6  
670 and IL-8 production. *Breast Cancer Res Treat.* 2012;135(3):737-47.



- 671 16. Wilson C, Wilson T, Johnston PG, Longley DB, Waugh DJ. Interleukin-8  
672 signaling attenuates TRAIL- and chemotherapy-induced apoptosis through  
673 transcriptional regulation of c-FLIP in prostate cancer cells. *Mol Cancer Ther.*  
674 2008;7(9):2649-61.
- 675 17. Balasoiu M, Balasoiu AT, Mogoanta SS, Barbalan A, Stepan AE, Ciurea RN, et  
676 al. Serum and tumor microenvironment IL-8 values in different stages of colorectal  
677 cancer. *Rom J Morphol Embryol.* 2014;55(2 Suppl):575-8.
- 678 18. Pine SR, Mechanic LE, Enewold L, Chaturvedi AK, Katki HA, Zheng YL, et al.  
679 Increased levels of circulating interleukin 6, interleukin 8, C-reactive protein, and risk of  
680 lung cancer. *J Natl Cancer Inst.* 2011;103(14):1112-22.
- 681 19. Bertini R, Allegretti M, Bizzarri C, Moriconi A, Locati M, Zampella G, et al.  
682 Noncompetitive allosteric inhibitors of the inflammatory chemokine receptors CXCR1  
683 and CXCR2: prevention of reperfusion injury. *Proc Natl Acad Sci U S A.*  
684 2004;101(32):11791-6.
- 685 20. Chapman RW, Phillips JE, Hipkin RW, Curran AK, Lundell D, Fine JS. CXCR2  
686 antagonists for the treatment of pulmonary disease. *Pharmacol Ther.* 2009;121(1):55-  
687 68.
- 688 21. Leaker BR, Barnes PJ, O'Connor B. Inhibition of LPS-induced airway neutrophilic  
689 inflammation in healthy volunteers with an oral CXCR2 antagonist. *Respir Res.*  
690 2013;14:137.
- 691 22. Maeda DY, Peck AM, Schuler AD, Quinn MT, Kirpotina LN, Wicomb WN, et al.  
692 Discovery of 2-[5-(4-Fluorophenylcarbamoyl)pyridin-2-ylsulfanylmethyl]phenylboronic  
693 Acid (SX-517): Noncompetitive Boronic Acid Antagonist of CXCR1 and CXCR2. *J Med*  
694 *Chem.* 2014;57(20):8378-97.
- 695 23. Dankort D, Curley DP, Cartlidge RA, Nelson B, Karnezis AN, Damsky WE, Jr., et  
696 al. Braf(V600E) cooperates with Pten loss to induce metastatic melanoma. *Nat Genet.*  
697 2009;41(5):544-52.
- 698 24. Liu L, Li M, Spangler LC, Spear C, Veenstra M, Darnall L, et al. Functional defect  
699 of peripheral neutrophils in mice with induced deletion of CXCR2. *Genesis.*  
700 2013;51(8):587-95.
- 701 25. Burd CE, Liu W, Huynh MV, Waqas MA, Gillahan JE, Clark KS, et al. Mutation-  
702 specific RAS oncogenicity explains NRAS codon 61 selection in melanoma. *Cancer*  
703 *Discov.* 2014;4(12):1418-29.
- 704 26. Muzumdar MD, Tasic B, Miyamichi K, Li L, Luo L. A global double-fluorescent  
705 Cre reporter mouse. *Genesis.* 2007;45(9):593-605.
- 706 27. Liu D, Schilling B, Liu D, Sucker A, Livingstone E, Jerby-Arnon L, et al.  
707 Integrative molecular and clinical modeling of clinical outcomes to PD1 blockade in  
708 patients with metastatic melanoma. *Nat Med.* 2019;25(12):1916-27.
- 709 28. Riaz N, Havel JJ, Makarov V, Desrichard A, Urba WJ, Sims JS, et al. Tumor and  
710 Microenvironment Evolution during Immunotherapy with Nivolumab. *Cell.*  
711 2017;171(4):934-49 e16.

- 712 29. Eikenberry S, Thalhauser C, Kuang Y. Tumor-immune interaction, surgical  
713 treatment, and cancer recurrence in a mathematical model of melanoma. *PLoS Comput*  
714 *Biol.* 2009;5(4):e1000362.
- 715 30. Petitprez F, Levy S, Sun CM, Meylan M, Linhard C, Becht E, et al. The murine  
716 Microenvironment Cell Population counter method to estimate abundance of tissue-  
717 infiltrating immune and stromal cell populations in murine samples using gene  
718 expression. *Genome Med.* 2020;12(1):86.
- 719 31. Sun L, Clavijo PE, Robbins Y, Patel P, Friedman J, Greene S, et al. Inhibiting  
720 myeloid-derived suppressor cell trafficking enhances T cell immunotherapy. *JCI Insight.*  
721 2019;4(7).
- 722 32. Kotarba G, Krzywinska E, Grabowska AI, Taracha A, Wilanowski T.  
723 TFCP2/TFCP2L1/UBP1 transcription factors in cancer. *Cancer Lett.* 2018;420:72-9.
- 724 33. Liu K, Zhang Y, Liu D, Ying QL, Ye S. TFCP2L1 represses multiple lineage  
725 commitment of mouse embryonic stem cells through MTA1 and LEF1. *J Cell Sci.*  
726 2017;130(22):3809-17.
- 727 34. Ouyang Z, Zhou Q, Wong WH. ChIP-Seq of transcription factors predicts  
728 absolute and differential gene expression in embryonic stem cells. *Proc Natl Acad Sci U*  
729 *S A.* 2009;106(51):21521-6.
- 730 35. Sun H, You Y, Guo M, Wang X, Zhang Y, Ye S. Tfc2l1 safeguards the  
731 maintenance of human embryonic stem cell self-renewal. *J Cell Physiol.*  
732 2018;233(9):6944-51.
- 733 36. Zhang M, Ji J, Wang X, Zhang X, Zhang Y, Li Y, et al. The transcription factor  
734 Tfc2l1 promotes primordial germ cell-like cell specification of pluripotent stem cells. *J*  
735 *Biol Chem.* 2021;297(4):101217.
- 736 37. Qiu D, Ye S, Ruiz B, Zhou X, Liu D, Zhang Q, et al. Klf2 and Tfc2l1, Two  
737 Wnt/beta-Catenin Targets, Act Synergistically to Induce and Maintain Naive  
738 Pluripotency. *Stem Cell Reports.* 2015;5(3):314-22.
- 739 38. Takashima Y, Guo G, Loos R, Nichols J, Fic2 G, Krueger F, et al. Resetting  
740 transcription factor control circuitry toward ground-state pluripotency in human. *Cell.*  
741 2014;158(6):1254-69.
- 742 39. Wang X, Wang X, Zhang S, Sun H, Li S, Ding H, et al. The transcription factor  
743 TFCP2L1 induces expression of distinct target genes and promotes self-renewal of  
744 mouse and human embryonic stem cells. *J Biol Chem.* 2019;294(15):6007-16.
- 745 40. Liu G, An L, Zhang H, Du P, Sheng Y. Activation of CXCL6/CXCR1/2 Axis  
746 Promotes the Growth and Metastasis of Osteosarcoma Cells in vitro and in vivo. *Front*  
747 *Pharmacol.* 2019;10:307.
- 748 41. Matsushima K, Yang, Oppenheim JJ. Interleukin-8: An evolving chemokine.  
749 *Cytokine.* 2022;153:155828.
- 750 42. Li MQ, Luo XZ, Meng YH, Mei J, Zhu XY, Jin LP, et al. CXCL8 enhances  
751 proliferation and growth and reduces apoptosis in endometrial stromal cells in an

- 752 autocrine manner via a CXCR1-triggered PTEN/AKT signal pathway. *Hum Reprod.*  
753 2012;27(7):2107-16.
- 754 43. Park GY, Pathak HB, Godwin AK, Kwon Y. Epithelial-stromal communication via  
755 CXCL1-CXCR2 interaction stimulates growth of ovarian cancer cells through p38  
756 activation. *Cell Oncol (Dordr)*. 2021;44(1):77-92.
- 757 44. Richmond A, Fan GH, Dhawan P, Yang J. How do chemokine/chemokine  
758 receptor activations affect tumorigenesis? *Novartis Found Symp.* 2004;256:74-89;  
759 discussion -91, 106-11, 266-9.
- 760 45. Charafe-Jauffret E, Ginestier C, Iovino F, Wicinski J, Cervera N, Finetti P, et al.  
761 Breast cancer cell lines contain functional cancer stem cells with metastatic capacity  
762 and a distinct molecular signature. *Cancer Res.* 2009;69(4):1302-13.
- 763 46. Larribere L, Utikal J. Stem Cell-Derived Models of Neural Crest Are Essential to  
764 Understand Melanoma Progression and Therapy Resistance. *Front Mol Neurosci.*  
765 2019;12.
- 766 47. Mica Y, Lee G, Chambers SM, Tomishima MJ, Studer L. Modeling neural crest  
767 induction, melanocyte specification, and disease-related pigmentation defects in hESCs  
768 and patient-specific iPSCs. *Cell Rep.* 2013;3(4):1140-52.
- 769 48. Yoganandarajah V, Patel J, van Schaijik B, Bockett N, Brasch HD, Paterson E, et  
770 al. Identification of Cancer Stem Cell Subpopulations in Head and Neck Metastatic  
771 Malignant Melanoma. *Cells.* 2020;9(2).
- 772 49. Utikal J, Maherali N, Kulalert W, Hochedlinger K. Sox2 is dispensable for the  
773 reprogramming of melanocytes and melanoma cells into induced pluripotent stem cells.  
774 *J Cell Sci.* 2009;122(Pt 19):3502-10.
- 775 50. Karras P, Bordeu I, Pozniak J, Nowosad A, Pazzi C, Van Raemdonck N, et al. A  
776 cellular hierarchy in melanoma uncouples growth and metastasis. *Nature.*  
777 2022;610(7930):190-8.
- 778
